# Supplementary material for: Preparative Biocatalytic Synthesis of α-Ketomethylselenobutyrate—A Putative Agent for Cancer Therapy
Source: MDPI journal article supplement (doi:10.3390/molecules28176178), 2023-08-22
Supplement: s1 [file s1]

## Supplementary materials

**Table S1.** The results of the performed biocatalytic reactions for the synthesis of KMSB.

| Experimental Stage                                                                        | Experiment number |              |              |              |
|-------------------------------------------------------------------------------------------|-------------------|--------------|--------------|--------------|
|                                                                                           | 1                 | 2            | 3            | 4            |
| Initial concentration of L-selenomethionine, mM                                           | 102               | 110          | 107          | 103          |
| Reaction mixture volume, ml                                                               | 13                | 10           | 25           | 25           |
| Concentration of L-amino acid oxidase, mg/ml                                              | 5                 | 5            | 4.6          | 4.2          |
| Concentration of catalase, mg/ml                                                          | 0.4               | 0.4          | 0.4          | 0.4          |
| Reaction time, h                                                                          | 7.5               | 6.9          | 8            | 7.5          |
| Yield of the KMSB by kinetics, %                                                          | 88                | 80           | 90           | 87           |
| Total yield of the KMSB (taking into account the stages of isolation and purification), % | 60                | 51           | 64           | 67           |
| Chemical purity of the KMSB, %                                                            | 99.3              | 99.5         | 99.6         | 99.6         |
| Content of L-selenomethionine in the KMSB preparation, %                                  | not detected      | not detected | not detected | not detected |
| Content of unidentified impurities in the KMSB preparation, %                             | 0.7               | 0.5          | 0.4          | 0.4          |
| The volume of the final solution of the KMSB, ml                                          | 3.5               | 2.5          | 7            | 6.5          |
| Concentration of KMSB in the final solution, mM                                           | 230               | 220          | 240          | 270          |
